# Supplementary material for: Pyr1-Mediated Pharmacological Inhibition of LIM Kinase Restores Synaptic Plasticity and Normal Behavior in a Mouse Model of Schizophrenia
Source: PubMed Central journal article supplement (PMC8006432; doi:10.3389/fphar.2021.627995), 2021-03-12
Supplement: datasheet1.pdf [file datasheet1.pdf]

## Supplementary Figure S1

### \*Effect of Pyr1 on cofilin phosphorylation

Hippocampal neurons from Wild Type (WT) or MAP6 heterozygous (He) mice were incubate with or without 20 $\mu$ M of Pyr1 during 30 min, lysed and proteins analyzed by western blot (as in Fig1 A).

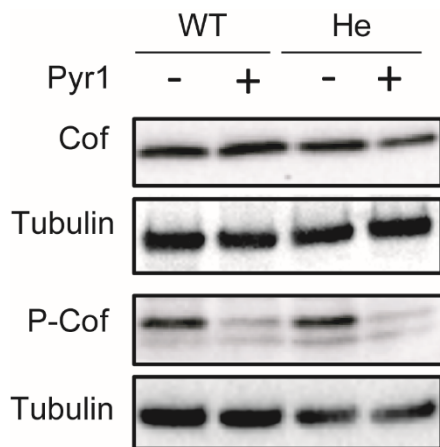

Pyr1 treatment induces a decrease of P-Cof in WT and MAP6 He neurons.

### \*Level of Cofilin and LIMK in mice cortices

Cortices of WT and MAP6 KO mice were lysed in HEPES-NP40 buffer (50mM Hepes pH7, 150mM NaCl, 5 mM MgCl<sub>2</sub>, 5mM CaCl<sub>2</sub>) supplemented with proteases and phosphatases inhibitors. Lysates were analyzed with similar protocol as in Fig 1B. Antibodies used were rabbit polyclonal anti-cofilin (1/2000, Cell Signaling), anti-phospho Cofilin (1/2000, P-Cof, Ser3, Cell Signaling), anti LIMKinase (1/1000, Cell Signaling), anti-phospho LIMK (1/1000, thr508, Abcam). Quantification of protein were normalized on tubulin and expressed as a % of the WT quantity (mean  $\pm$  SEM.; n=3 WT and 3 MAP6 KO mice, respectively). No significant difference was found.

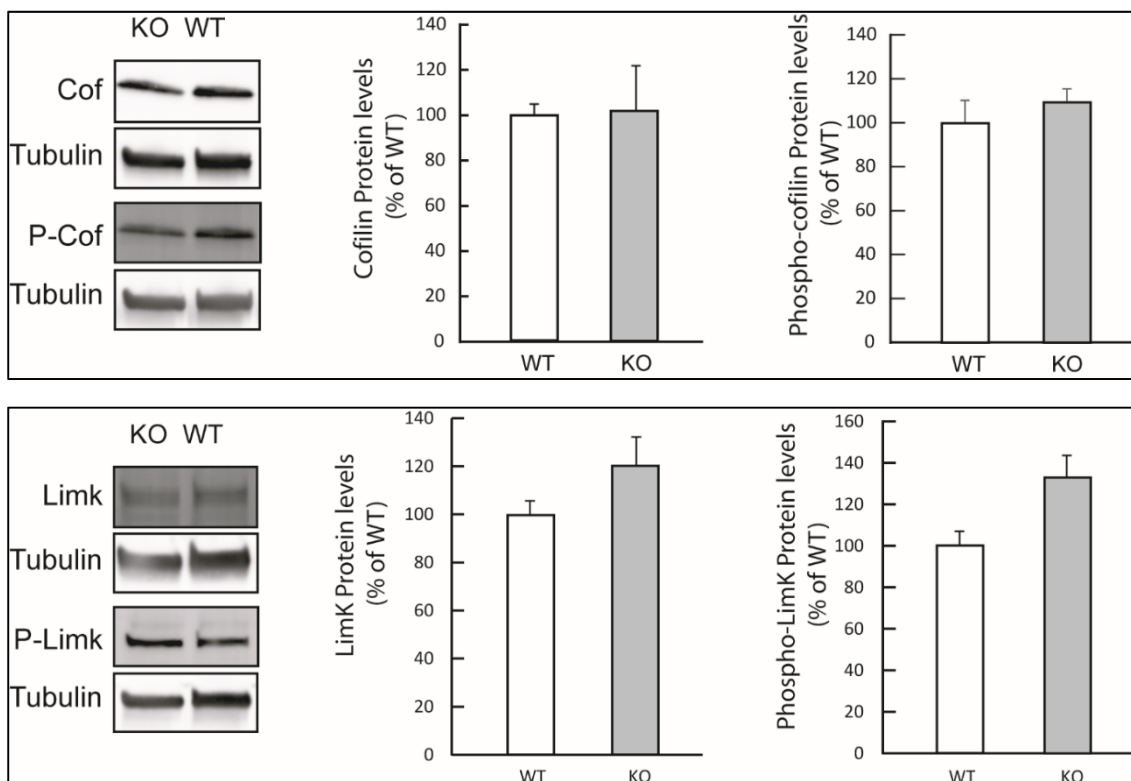

## Supplementary Figure S2

### Analysis of actin stability at 4°C in MAP6 KO neurons

MAP6 KO neurons at 10 DIV were exposed or not to cold (45 min, 4 °C), permeabilized (30 mM Pipes, 1 mM EGTA, 1 mM MgCl<sub>2</sub>, 10% glycerol, 1% Triton X100, pH 6.75) for 1 min and fixed in cold methanol (6 min, -20 °C). For immunofluorescence, anti-βactin mAb was used as primary antibody (ab6276 Abcam, 1/200, 1 hour) and revealed with anti-mouse coupled to AF 488 (1/1000, Jackson Immuno-Research Laboratories).

No significant difference was observed.

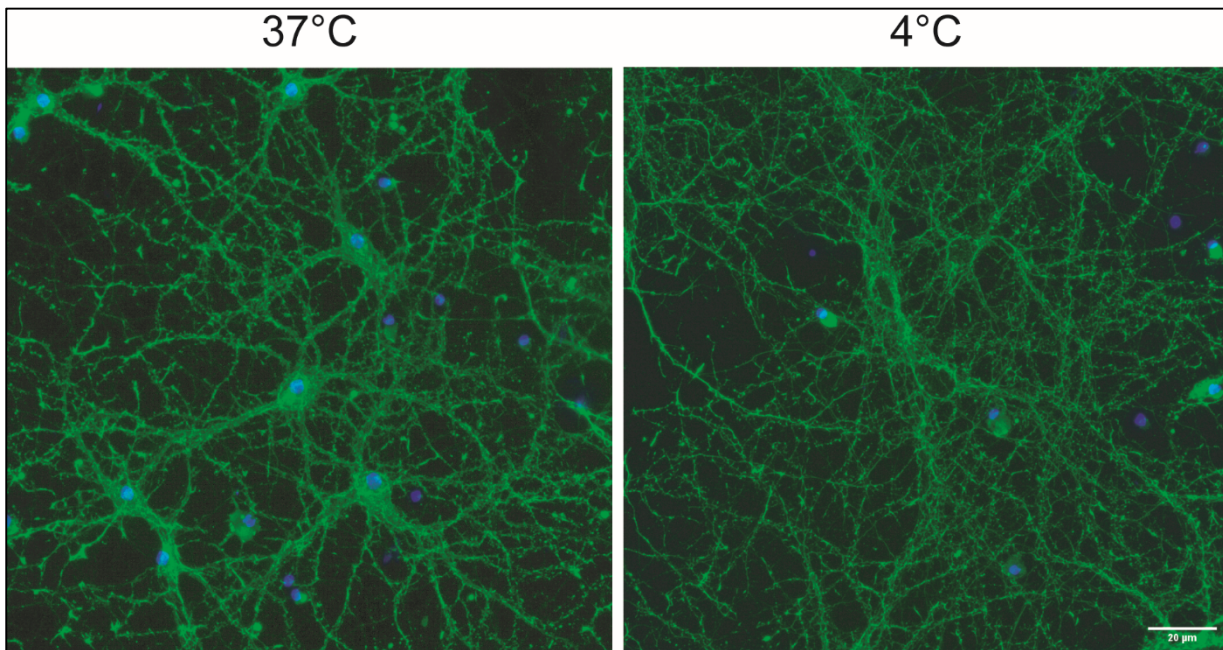

## Supplementary Figure S3

### Quantification of Pyr1 content in mice brains using LC-MS/MS

LC-MS/MS profiles obtained for untreated and Pyr1 treated mice.

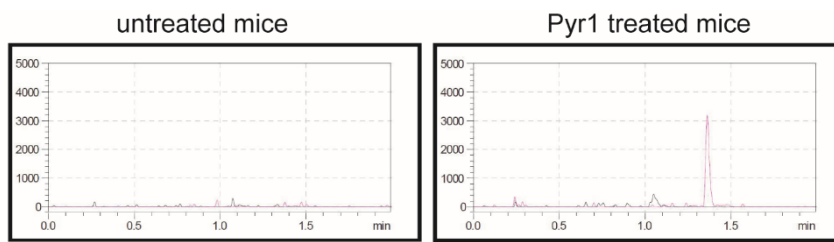

Table 1

| Mice number | Pic surface area | Pyr 1 quantity (nmol/brain) | Pyr1 concentration (nM) |
|-------------|------------------|-----------------------------|-------------------------|
| 1           | 5653             | 0,052                       | 119                     |
| 3           | 3276             | 0,03                        | 69                      |
| 4           | 4860             | 0,044                       | 101                     |
| 7           | 2142             | 0,02                        | 46                      |
| 9           | 6562             | 0,06                        | 138                     |
|             |                  | Average                     | 95 nM                   |

Mice were euthanized by cervical dislocation, brains rapidly dissected, frozen in liquid nitrogen and stored at -80°C until processing. Briefly, each half brain was milled in 400 µL of saline buffer, and Acetonitrile (800 µL) was added to extract Pyr1 compound. The samples were shaken with a vortex for 3 minutes and then placed for 3 minutes in a sonicator. Precipitated proteins and solid residues were sedimented by centrifugation at 15,000g for 5 min at 4°C. The supernatants were transferred in a microplate for analysis by LC-MS/MS (Shimadzu LC-MS 8030) by TechMedIII company (Illkirch, France). The Pyr 1 concentration was calculated using an average brain volume of 430 mm<sup>3</sup> as previously determined (Gimenez et al., 2017).

An average concentration of 95 nM of Pyr 1 was found in the mice brains, after 6 weeks of treatment (100 mg/kg/week), whereas no detectable Pyr1 molecule was found in untreated mice.

Gimenez, U., et al., 2017. 3D imaging of the brain morphology and connectivity defects in a model of psychiatric disorders: MAP6-KO mice. *Sci Rep.* 7, 10308.

## Supplementary Figure S4

### \*Long-Term Potentiation (LTP) assayed in wild type and MAP6 KO mice

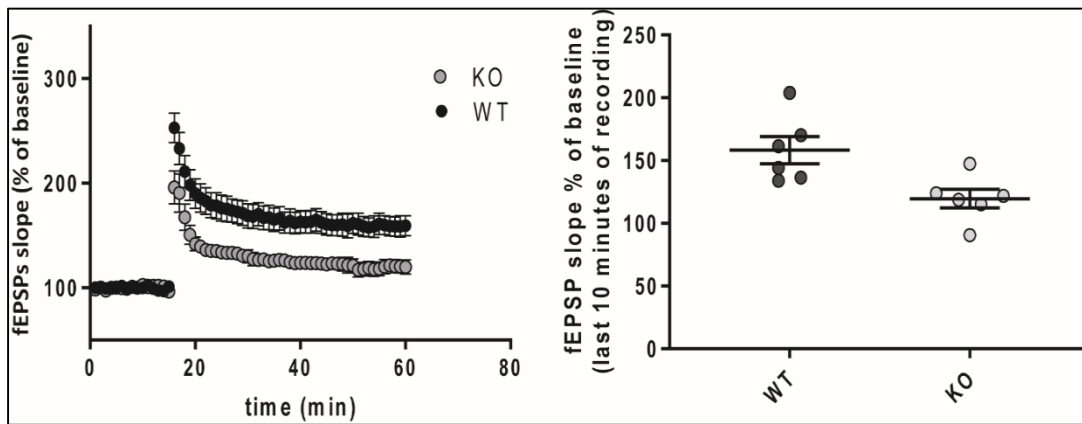

Wild type and MAP6 KO mice LTP were evaluated (as in Fig 2F-G).

Left panel: fEPSP slopes expressed as a percentage of baseline were plotted against time for WT and MAP6 Ko mice brain slices.

Right panel: fEPSP slopes measured over the last 10 min of recordings, expressed as a percentage of the baseline of the fEPSP slope ( $158.23 \pm 10.8$  and  $119.57 \pm 7.4$  for wild type and MAP6 KO mice, respectively). Values correspond to mean  $\pm$  SEM.  $n=8$  slices from 3 wild type mice and  $n=7$  slices from 4 MAP6 KO mice. Mann-Whitney test,  $p$  value is 0.0152.

MAP6 KO mice exhibit an altered LTP

### \*Social interaction of WT and MAP6 KO mice

Social interaction was assayed using the resident intruder test with a protocol similar to the one used in Fig 3A. (mean  $\pm$  SEM.;  $n=7$  and  $n=9$  for WT and MAP6 KO mice, respectively).

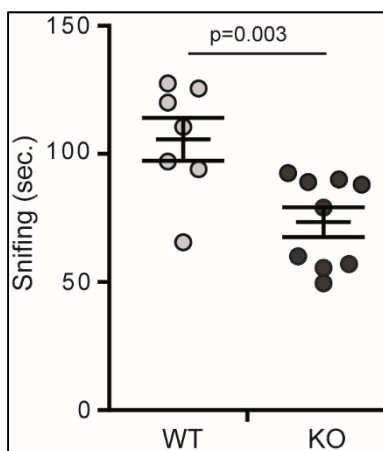

MAP6 KO mice exhibit social withdrawal.

## Supplementary Figure S5

### Pyr1 treatment does not modify hippocampal neurogenesis

To study neuronal progenitor proliferation, mice were injected with EdU (5-ethynyl-2'-deoxyuridine) (50 mg/kg), 3, 6 and 24h after the last Pyr1 injection. Mice were sacrificed by transcardial perfusion with 4% paraformaldehyde, brains post-fixed for 15 h and cryoprotected in sucrose, before being sliced into coronal free-floating sections (40  $\mu$ m). Sections were processed as previously described (Jonckheere et al., 2018).

Sections were observed with epifluorescence (Zeiss axioskop). EdU-labeled nuclei were counted within the dentate gyrus every 4 sections throughout the rostro-caudal extent of the hippocampus from bregma -1.34 to -3.38.

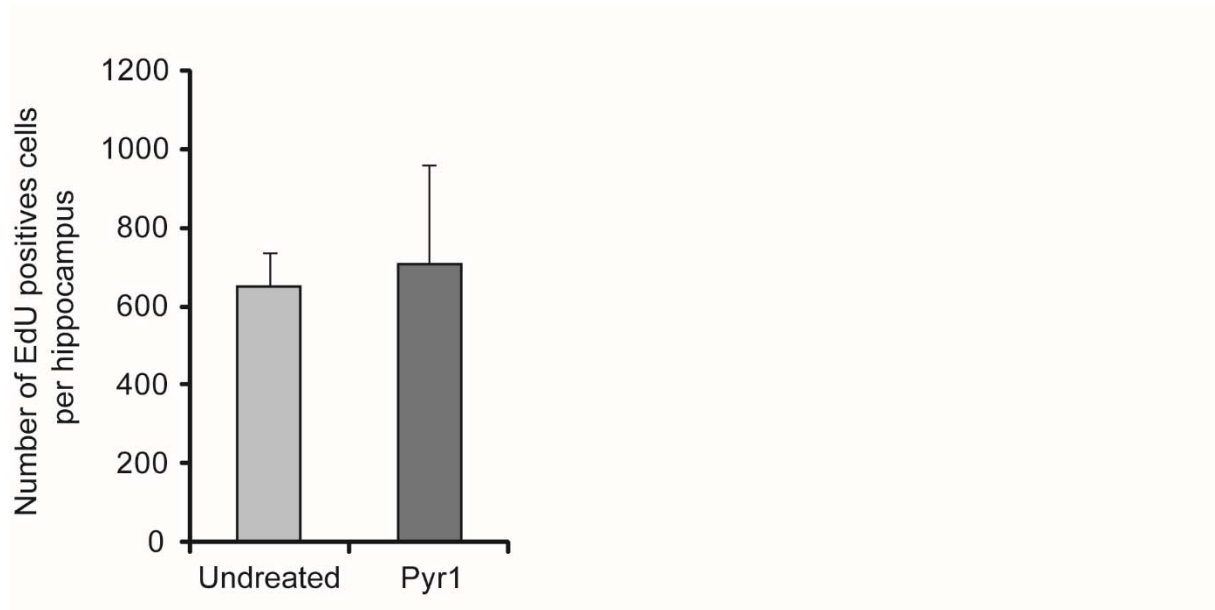

Number of EdU-positive cells per hippocampus (mean  $\pm$  SEM.; n=7 and n=5 for DMSO- and Pyr1-treated mice, respectively)

These results show that Pyr1 treatment did not modify the number of EdU-positive cells in the subgranular zone of the hippocampus after chronic treatment (during 6 weeks).

Jonckheere, J., et al., 2018. Short- and long-term efficacy of electroconvulsive stimulation in animal models of depression: The essential role of neuronal survival. *Brain Stimul.* 11, 1336-1347.
